# Supplementary material
Source: MDPI journal article supplement (https://www.mdpi.com/1999-4907/14/1/34)
Supplement: s1 [file s1]

# Supplementary Material

## 1. Contents of this file

Figure S1

Figure S2

Table S1

Table S2

## 2. Supplementary Figures and Tables

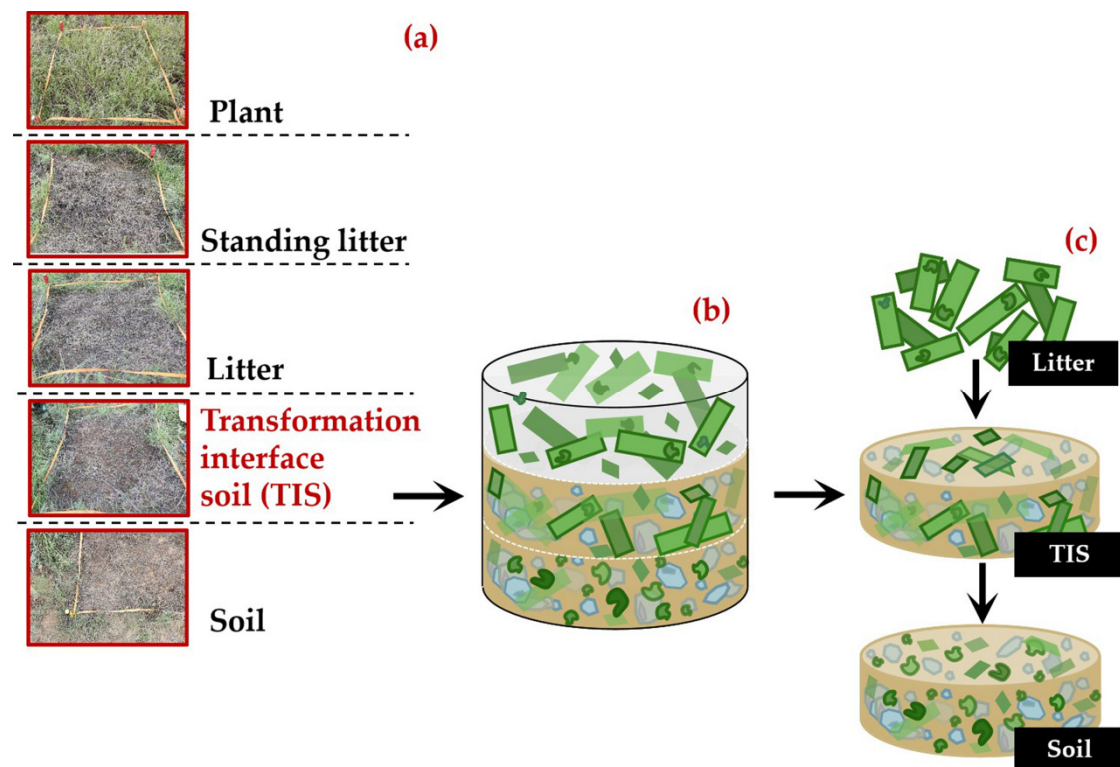

**Figure S1.** Definition of the transformation interface soil layer (TIS). (a) Sample plot; (b) Spatial structure diagram of the transformation interface soil layer; (c) Division of litter, transformation interface soil layer (0-0.5cm), and mineral soil. TIS, transformation interface soil layer.

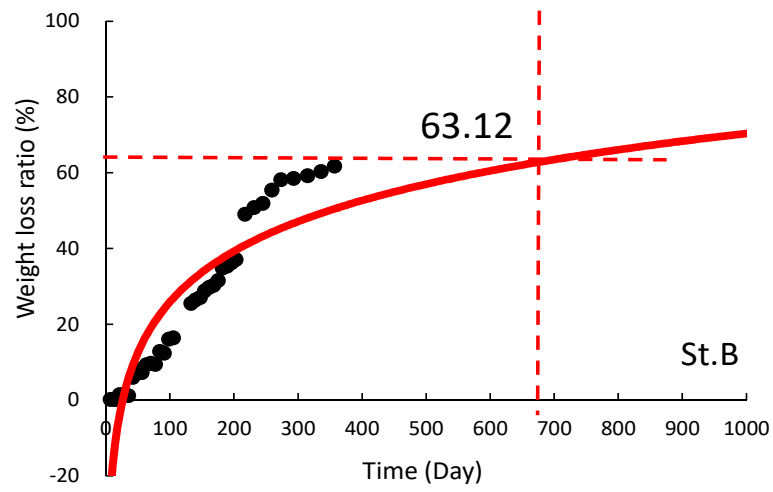

**Figure S2.** Dynamic fitting of weight loss rates and decomposition processes of *Stipa bungeana* (St. B).

**Table S1.** Basic information on the soil extracellular enzymes (EEAs) investigated here.

| EEAs                             | Abbreviation | ECN      | Corresponding substrate                          | Function                                                                                                         |
|----------------------------------|--------------|----------|--------------------------------------------------|------------------------------------------------------------------------------------------------------------------|
| $\beta$ -1,4-glucosidase         | BG           | 3.2.1.21 | 4-MUB- $\beta$ -D-glucoside                      | Cellulose degradation: hydrolyses glucose from cellobiose                                                        |
| $\beta$ -D-cellobiohydrolase     | CBH          | 3.2.1.91 | 4-MUB- $\beta$ -D-cellobioside                   | Cellulose degradation: hydrolyses cellobiose dimers from non-reducing ends of cellulose molecules.               |
| Leucine-aminopeptidase           | LAP          | 3.4.11.1 | L-leucine-7-amido-4-methylcoumarin hydrochloride | Proteolysis: hydrolyses leucine and other hydrophobic amino acids from the N-terminus of oligo- and polypeptides |
| $\beta$ -N-acetylglucosaminidase | NAG          | 3.2.1.14 | 4-MUB-N-acetyl- $\beta$ -D-glucosaminide         | Chitin and peptidoglycan degradation: hydrolyses glucosamine from chitobiose, chitosan, and chitin               |
| alkaline phosphatase             | AP           | 3.1.3.1  | 4-MUB-phosphate                                  | Organophosphorus decomposition: Hydrolyses terminal phosphate moieties from phospho-monoesters                   |

**Table S2.** Variation in substrate properties.

| Day | SOC                   | TN                    | TP                    | DC                     | DN                     | DP                     | MBC                    | MBN                    | MBP                    |
|-----|-----------------------|-----------------------|-----------------------|------------------------|------------------------|------------------------|------------------------|------------------------|------------------------|
| s   | (g·kg <sup>-1</sup> ) | (g·kg <sup>-1</sup> ) | (g·kg <sup>-1</sup> ) | (mg·kg <sup>-1</sup> ) |
| 1   | 23.87±0.61            | 2.03±0.02             | 0.76±0.02             | 450.3±18.34            | 150.29±2.11            | 14.68±0.47             | 644.47±8.78            | 161.24±2.66            | 24.83±0.46             |
| 6   | 21.8±0.55             | 1.97±0.03             | 0.7±0.01              | 428.73±0.07            | 142.52±7.27            | 12.79±0.73             | 648.35±13.09           | 160.65±3.16            | 20.71±0.76             |
| 13  | 21.73±0.29            | 2.02±0.01             | 0.66±0.03             | 394.46±1.52            | 115.41±2.68            | 14.24±0.11             | 606.99±7               | 133.33±1.59            | 24.66±0.57             |
| 20  | 22.48±0.04            | 2.04±0.05             | 0.64±0.05             | 343.83±0.32            | 107.85±2.32            | 12.83±0.42             | 567.79±8.22            | 128.77±2.09            | 23.83±0.47             |
| 28  | 21.16±0.07            | 1.99±0.08             | 0.61±0.01             | 340.53±44.66           | 97.96±1.46             | 13.95±1.31             | 608.84±7.62            | 145.89±1.75            | 23.3±0.64              |
| 36  | 21.24±0.11            | 1.99±0.05             | 0.63±0.01             | 270.12±22.15           | 80.58±4.84             | 11.59±0.26             | 483.27±8.76            | 97.01±3.6              | 22.28±0.32             |
| 45  | 21.84±0.07            | 1.99±0.13             | 0.63±0.03             | 230.62±7.93            | 80.34±8.02             | 9.34±0.98              | 445.9±6.99             | 102.82±2.5             | 20.29±1.12             |
| 54  | 20.34±0.09            | 1.92±0.14             | 0.63±0.02             | 195.85±10.18           | 89.79±1.45             | 9.79±0.6               | 345.69±8.17            | 84.08±1.51             | 15.4±0.15              |
| 64  | 21.42±0.79            | 2.04±0.01             | 0.65±0.02             | 127.23±16.16           | 71.08±0.09             | 8.95±0.54              | 347.84±1.11            | 71.09±1.4              | 12.15±0.14             |
| 74  | 25.38±0.38            | 2.01±0.08             | 0.68±0.03             | 175.09±2.43            | 96.83±7.72             | 10.12±0.6              | 404.12±1.42            | 97.03±0.81             | 14.3±0.28              |
| 84  | 23.18±0.4             | 1.97±0.01             | 0.7±0.02              | 147.22±9.91            | 92.59±0.45             | 12.65±1.44             | 300.54±2.01            | 106.86±1.64            | 14.6±0.22              |
| 95  | 22.01±1.81            | 1.91±0.07             | 0.66±0.03             | 127.93±7.13            | 77.02±6.53             | 14.61±1.12             | 383.25±6.1             | 75.12±1.06             | 13.18±0.96             |
| 106 | 22.35±1.3             | 1.97±0.15             | 0.69±0.02             | 138.82±5.17            | 68.71±0.75             | 10.6±0.44              | 435.91±20.1            | 59.57±1.56             | 9.93±0.11              |
| 117 | 22.47±0.07            | 1.92±0.11             | 0.7±0.01              | 131.26±9.3             | 61.26±7.17             | 12.95±0.06             | 373.41±7.9             | 61.47±1.97             | 8.69±0.09              |
| 129 | 21.21±0.27            | 1.86±0.08             | 0.68±0.01             | 107.1±3.69             | 49.34±5.44             | 12.66±0.5              | 314.05±7.17            | 44.57±1.43             | 8.64±0.19              |
| 141 | 21.79±1.03            | 1.83±0.05             | 0.7±0.03              | 126.74±1.12            | 36.18±0.82             | 14.21±0.25             | 406.71±8.87            | 36.37±0.45             | 7.98±0.67              |
| 153 | 19.84±0.24            | 1.96±0.07             | 0.71±0.03             | 136.44±1.56            | 42.86±4.18             | 16.31±0.54             | 378.5±8.53             | 38.28±0.98             | 5.09±0.23              |
| 166 | 21.34±1.55            | 2.06±0.18             | 0.67±0.02             | 130.78±3.44            | 42.2±3.68              | 16.85±0.72             | 410.85±7.42            | 47.35±0.3              | 4.6±0.22               |
| 179 | 22.08±0.78            | 1.89±0.16             | 0.69±0.01             | 128.56±3.78            | 37.15±0.74             | 17.98±0.42             | 401.21±8.12            | 35.79±0.86             | 6.15±0.14              |
| 192 | 19.95±0.35            | 1.88±0.07             | 0.68±0.02             | 138.85±1.84            | 38.32±0.75             | 19.36±1.09             | 390.3±6.05             | 43.95±1.51             | 6.12±0.17              |

|     |        |        |        |            |         |          |            |          |         |
|-----|--------|--------|--------|------------|---------|----------|------------|----------|---------|
| 205 | 18.83± | 1.85±  | 0.68±  | 127.85±    | 43.92±  | 18.33±   | 384.28±    | 41.8±    | 6.52±   |
|     | 0.13   | 0.08   | 0.02   | 3.46       | 0.86    | 0.24     | 1.65       | 2.22     | 0.33    |
| 219 | 20.82± | 1.94±  | 0.67±0 | 131.04±    | 30.9±   | 17.53±   | 354.3±6.05 | 32.41±   | 7.15±   |
|     | 0.47   | 0.03   |        | 5.07       | 2.49    | 0.02     |            | 2.15     | 0.14    |
| 233 | 19.36± | 1.84±  | 0.68±  | 145.1±1.52 | 35.75±  | 16.76±   | 369.15±    | 44.09±   | 5.34±   |
|     | 1.21   | 0.06   | 0.01   |            | 1.77    | 0.19     | 0.23       | 1.94     | 0.23    |
| 247 | 18.71± | 1.97±  | 0.66±  | 136.17±    | 43.28±  | 13.97±   | 388.96±    | 39.7±0.5 | 4.16±   |
|     | 0.24   | 0.14   | 0.03   | 3.29       | 1.86    | 0.91     | 13.42      |          | 0.13    |
| 261 | 18.79± | 2.05±  | 0.69±  | 133.7±0.79 | 34.61±  | 12.66±   | 379.99±    | 34.76±   | 7.56±   |
|     | 0.26   | 0.03   | 0.01   |            | 3.47    | 0.54     | 0.52       | 0.4      | 0.43    |
| 276 | 18.98± | 1.87±  | 0.71±  | 120.9±2.58 | 39.54±  | 12.04±   | 332.18±    | 37.85±   | 6.47±   |
|     | 0.31   | 0.03   | 0.02   |            | 1.67    | 0.34     | 7.29       | 0.67     | 0.4     |
| 291 | 19.03± | 1.88±  | 0.7±   | 106.4±     | 32.03±  | 11.88±   | 334.22±    | 25.23±   | 6.63±   |
|     | 0.47   | 0.01   | 0.02   | 11.88      | 15.08   | 0.25     | 22.63      | 1.18     | 0.35    |
| 306 | 18.02± | 1.94±  | 0.7±   | 133.6±8.49 | 46.85±  | 10.53±   | 282.11±    | 9.17±    | 9.75±   |
|     | 0.83   | 0.13   | 0.02   |            | 1.48    | 0.32     | 6.76       | 2.03     | 1.06    |
| 321 | 17.56± | 1.9±   | 0.68±  | 148.6±     | 30.91±  | 9.4±0.21 | 300.89±    | 14.31±   | 11.56±  |
|     | 0.2    | 0.02   | 0.02   | 14.42      | 0.83    |          | 13.2       | 0.53     | 0.09    |
| 337 | 18.3±  | 1.92±  | 0.67±  | 178±5.09   | 64.34±  | 11.9±    | 223.11±    | 43.84±   | 14.5±   |
|     | 1.34   | 0.05   | 0.01   |            | 3.49    | 0.14     | 13.83      | 3.99     | 0.18    |
| 353 | 20.95± | 2.02±0 | 0.69±  | 147.2±6.79 | 55.31±  | 14.55±   | 191.33±    | 30.96±   | 12.06±  |
|     | 0.77   |        | 0.02   |            | 5.17    | 0.21     | 2.83       | 1.04     | 0.8     |
| 369 | 19.78± | 2.06±  | 0.68±  | 151±17.82  | 54±3.83 | 12.53±   | 203.33±    | 5.37±    | 8.69±   |
|     | 1.63   | 0.01   | 0.01   |            |         | 0.46     | 5.34       | 1.46     | 0.44    |
| 385 | 20.23± | 1.96±  | 0.69±0 | 140.6±4.24 | 56.9±   | 17±0.42  | 137.78±    | 7.36±1.1 | 11.06±  |
|     | 2.59   | 0.18   |        |            | 1.41    |          | 21.37      |          | 0.09    |
| 401 | 21.23± | 1.81±  | 0.68±  | 221.4±8.77 | 62.7±   | 10.48±   | 110.22±    | 29.66±   | 10.38±0 |
|     | 0.17   | 0.18   | 0.02   |            | 3.23    | 0.46     | 13.83      | 1.71     |         |
| 418 | 19.42± | 1.92±  | 0.7±   | 203.2±2.83 | 61.84±  | 14.23±   | 145.33±    | 29.23±   | 8.5±2.3 |
|     | 1.26   | 0.09   | 0.01   |            | 0.08    | 0.04     | 15.71      | 0.49     |         |
| 436 | 17.39± | 1.78±0 | 0.67±  | 259.2±     | 70.25±  | 19.55±   | 156.44±    | 23.19±   | 7.81±   |
|     | 0.91   |        | 0.03   | 17.54      | 0.07    | 0.35     | 1.26       | 2.69     | 0.44    |
| 453 | 18.01± | 1.7±   | 0.7±   | 248.8±4.53 | 75.35±  | 14.43±   | 179±3.3    | 15.92±   | 6.44±   |
|     | 0.13   | 0.11   | 0.02   |            | 0.35    | 0.67     |            | 0.52     | 0.62    |
| 471 | 18.83± | 1.82±  | 0.64±  | 254.8±1.7  | 74.32±  | 21.03±   | 164.67±    | 13.03±   | 5.31±   |
|     | 1.15   | 0.04   | 0.03   |            | 3.73    | 0.74     | 4.09       | 3.38     | 1.5     |
| 490 | 18.09± | 1.63±  | 0.67±  | 239.2±     | 96.8±   | 19.65±   | 182.22±    | 10.42±   | 8.31±   |
|     | 0.65   | 0.06   | 0.02   | 48.08      | 7.28    | 0.35     | 6.29       | 0.22     | 0.8     |
| 512 | 17.37± | 1.73±  | 0.66±  | 263.4±     | 94.23±  | 17.8±1.7 | 171.56±    | 9.86±    | 7.63±   |
|     | 0.4    | 0.11   | 0.03   | 13.86      | 3.64    |          | 13.83      | 0.39     | 0.35    |
